# Supplementary material for: Conformationally restricted 3′-modified ABA analogs for controlling ABA receptors
Source: Royal Society of Chemistry journal article supplement (doi:10.1039/c4ob02662d), 2015-01-01

## **Conformationally restricted 3'-modified ABA analogs for controlling ABA receptors**

Jun Takeuchi, Toshiyuki Ohnishi, Masanori Okamoto and Yasushi Todoroki

### **Supporting Information**

- 1) Supplementary Figures
- 2)  $^1\text{H}$  and  $^{13}\text{C}$  NMR Spectrums of Synthesized Compounds

## 1) Supplementary Figures

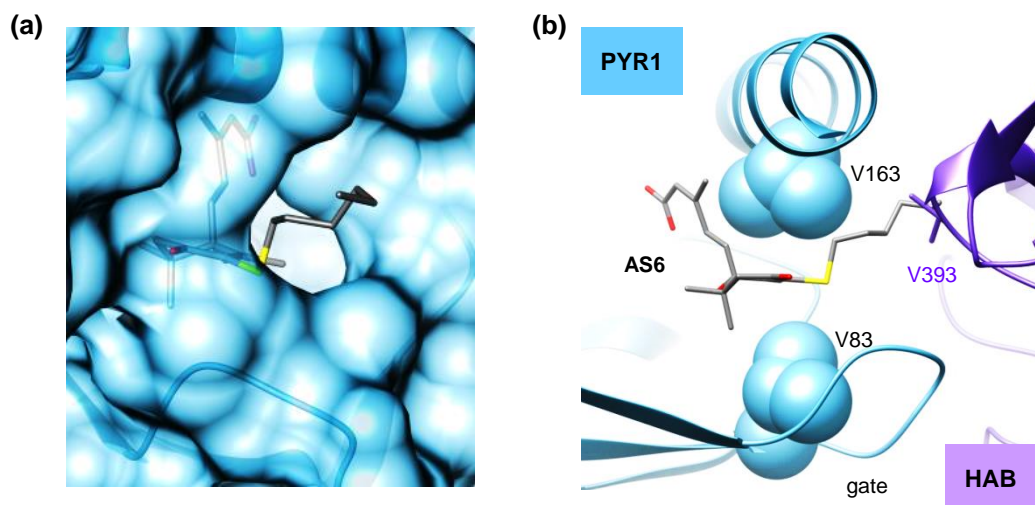

Supplementary Figure 1 The 3'-S-hexyl chain of AS6 protrudes through the narrow 3'-tunnel and blocks PP2C binding with no inhibiting the conformational change of PYL into the gate-closed form. (a) Crystal structure of PYR1-AS6 complex (PDB code 3WG8). The solvent-excluded surface (probe radius: 1.4 Å) prepared with Chimera software\*. (b) Superposition of the PYR1-AS6 complex and the PYR1-ABA-HAB1 (purple, PDB code 3QN1) complex.

\* E. F. Pettersen, T. D. Goddard, C. C. Huang, G. S. Couch, D. M. Greenblatt, E. C. Meng and T. E. Ferrin, *J. Comput. Chem.*, 2004, **25**, 1605–12.

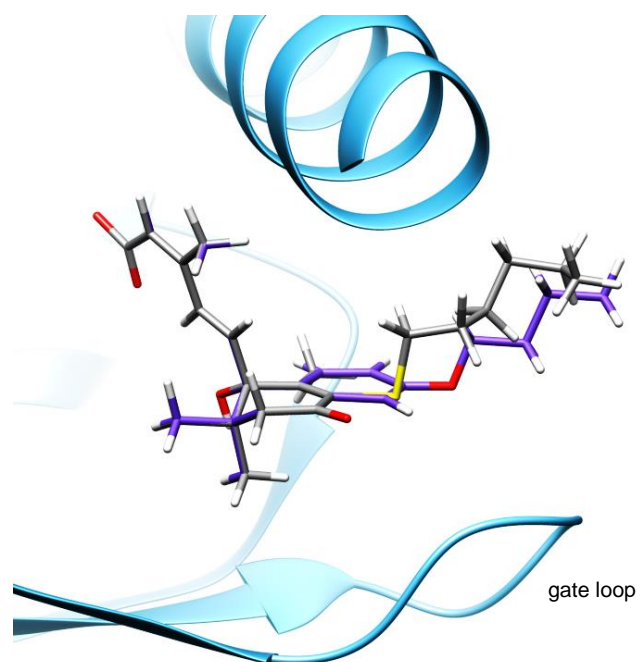

Supplementary Figure 2 Superposition of (+)-PAO4 and AS6 in the PYR1-AS6 complex (3WG8). AS6, gray sticks and (+)-PAO4, purple sticks.

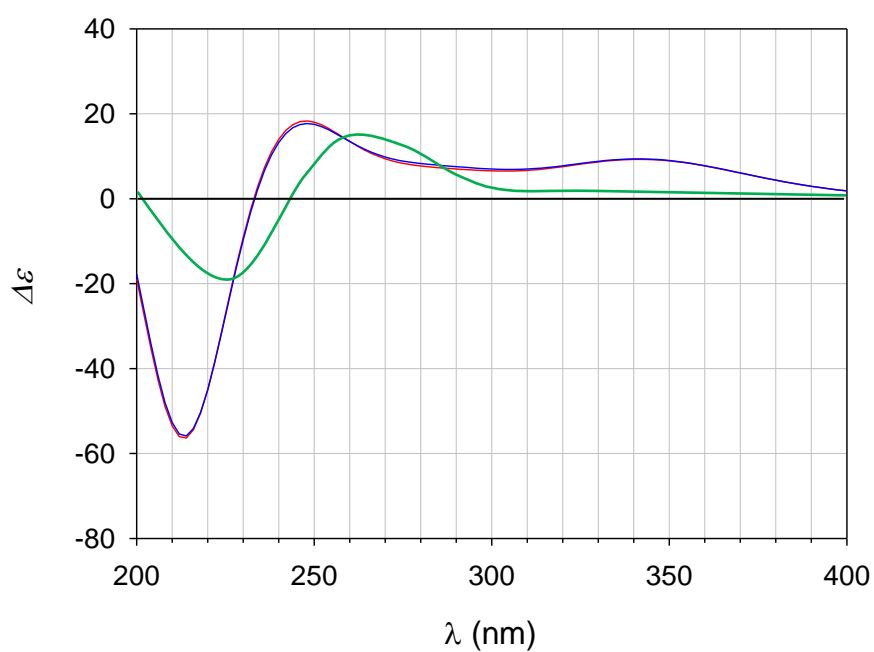

Supplementary Figure 3 Experimental CD spectrum of (+)-PAO4 in MeOH (green line) and theoretical CD curves of *S*-PAO4 calculated in the velocity (red line) and length (blue line) formalisms. The theoretical curves were obtained at the TDDFT/B3LYP/6-31G\*, taking into account the 30 lowest energy transitions and assuming a Gaussian distribution with  $\sigma_i = 0.2$  eV.

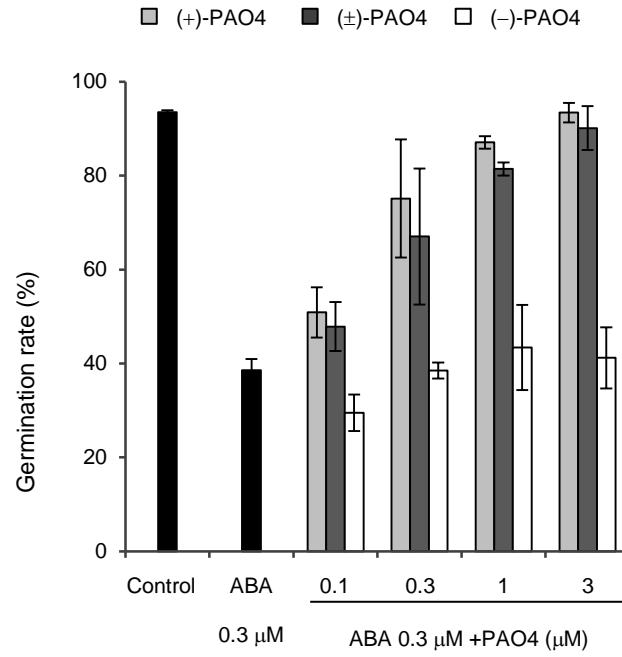

Supplementary Figure 4 Comparison of the activity of (+)-PAO4 and its racemate. *Arabidopsis* seed germination rate in response to 0.3 μM ABA and (+)-PAO4 or its racemate applied when the germination rate of ABA-treated plants was 40% ( $n = 3$ ; error bars represent s.d.).

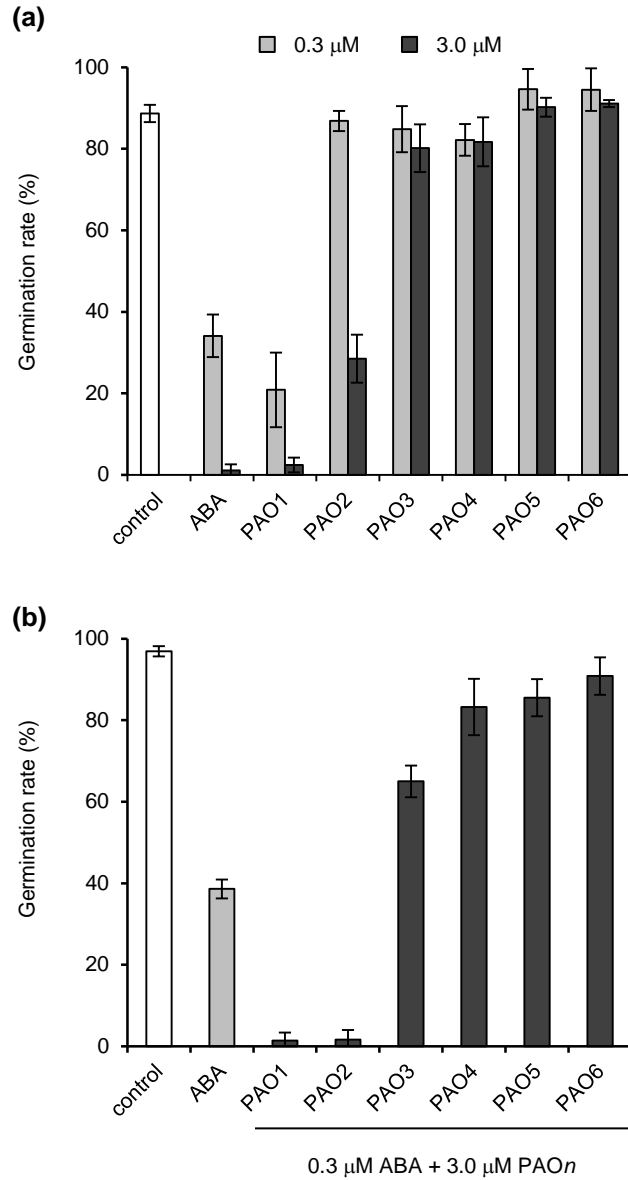

Supplementary Figure 5 Effect of ( $\pm$ )-PAOn compounds on *Arabidopsis* seed germination. (a) Seed germination rate in response to ( $\pm$ )-PAOn at 48 h after stratification ( $n = 3$ ; error bars represent s.d.). (b) Seed germination rate in response to 0.3  $\mu\text{M}$  ABA and 0.3 or 3.0  $\mu\text{M}$  ( $\pm$ )-PAOn applied when the germination rate of ABA-treated plants was 40% ( $n = 3$ ; error bars represent s.d.).

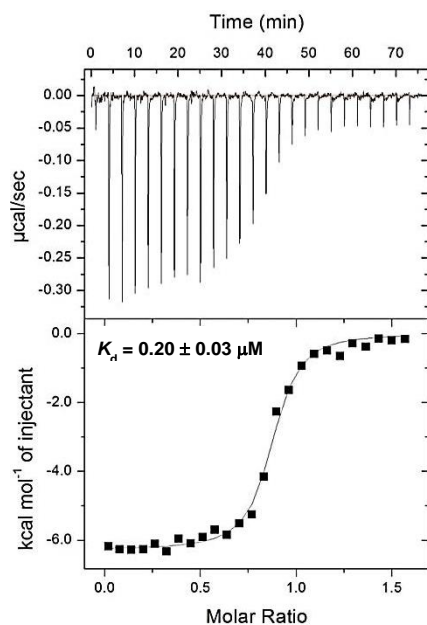

[(+)-PAO1/PYL5]

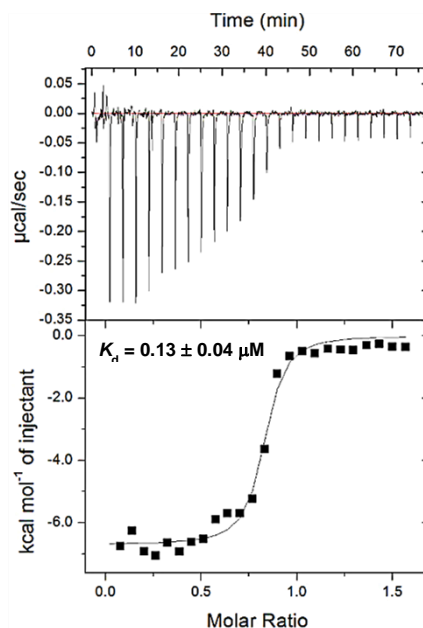

[(+)-PAO4/PYL5]

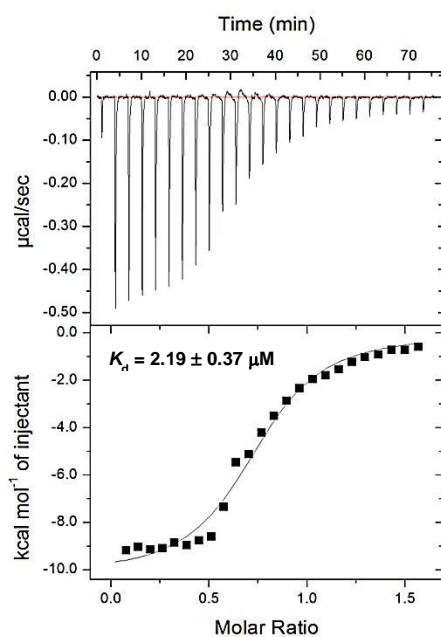

[(+)-PAO1/PYL10]

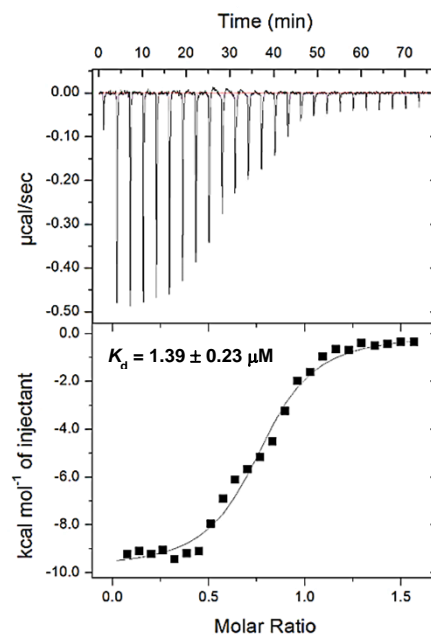

[(+)-PAO4/PYL10]

Supplementary Figure 6 Isothermal titration calorimetry profiles and thermodynamic data for (+)-PAO4-PYLS binding experiments. The data were corrected by subtraction the mixing enthalpies of (+)-PAO1 and (+)-PAO4 solution into protein-free solution and fitted by Origin for ITC with 1:1 binding model.

(a)

| Amino acid<br>(PYR1 #) | PYR1 | PYL1 | PYL2 | PYL3 | PYL4 | PYL5 | PYL6 | PYL7 | PYL8 | PYL9 | PYL10 | PYL11 | PYL12 | PYL13 |
|------------------------|------|------|------|------|------|------|------|------|------|------|-------|-------|-------|-------|
| 83 <sup>a</sup>        | V    | V    | V    | V    | V    | V    | V    | V    | V    | V    | L     | V     | V     | L     |
| 163 <sup>b</sup>       | V    | V    | V    | V    | I    | I    | I    | L    | L    | L    | L     | I     | I     | I     |

<sup>a</sup> The residue at the N-terminal of the gate loop region

<sup>b</sup> The residue at the  $\alpha$ 3 helix

(b)

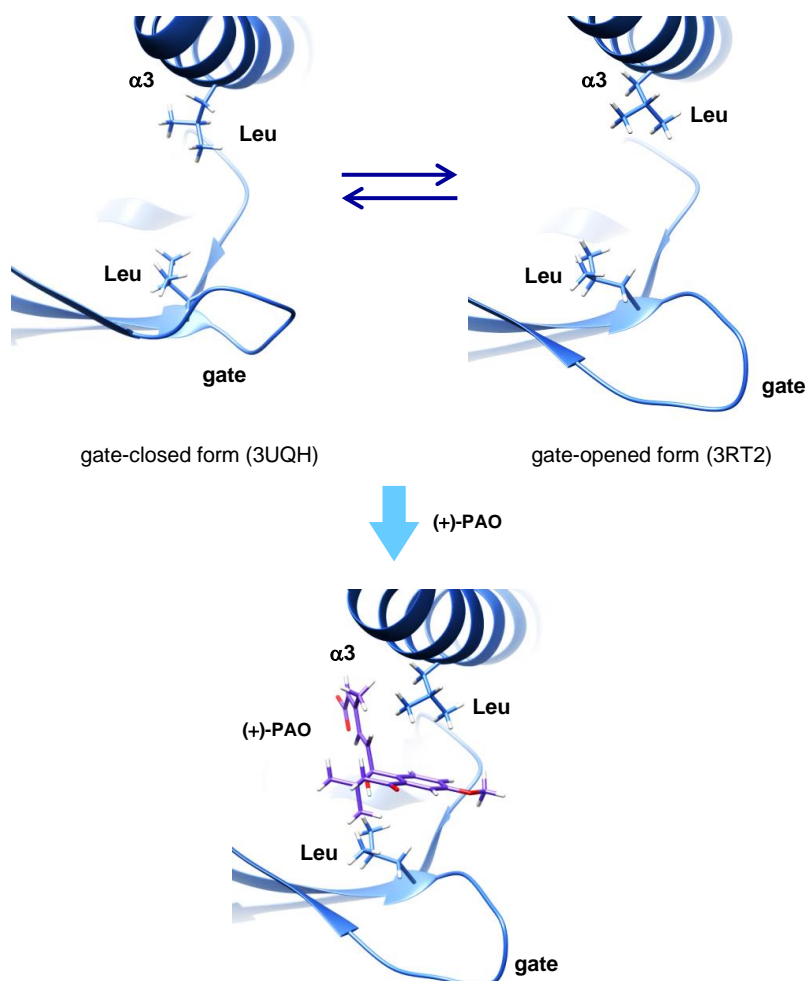

A model of PYL10-(+)-PAO1 complex.  
(+)-PAO1 is inserted into PYL10 gate-opened form (3RT2).

Supplementary Figure 7 The complicated profile of (+)-PAO1 may be attributed to interactions between the 3'-substituent and the residues comprising the 3'-tunnel of PYLs. (a) Sequence alignment at the N-terminal of the gate loop and  $\alpha$ 3 helix of PYL subtypes. (b) (+)-PAO1 may stabilize the inactive gate-opened form of PYL10 by interactions with two Leu residues, that is, it may function as an inverse agonist for PYL10.



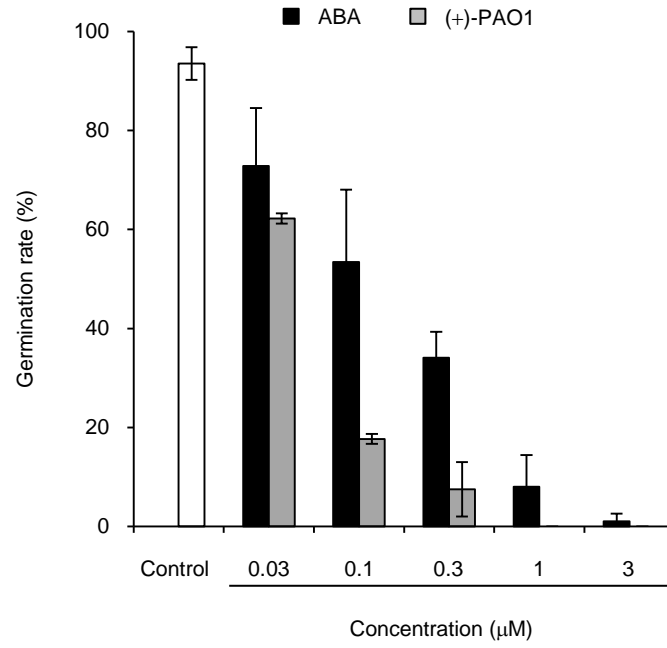

Supplementary Figure 8 Effect of (+)-PAO1 of *Arabidopsis* seed germination compared with that of ABA. *Arabidopsis* seed germination rate in response to (+)-PAO1 or ABA at 48 h after stratification ( $n = 3$ ; error bars represent s.d.).

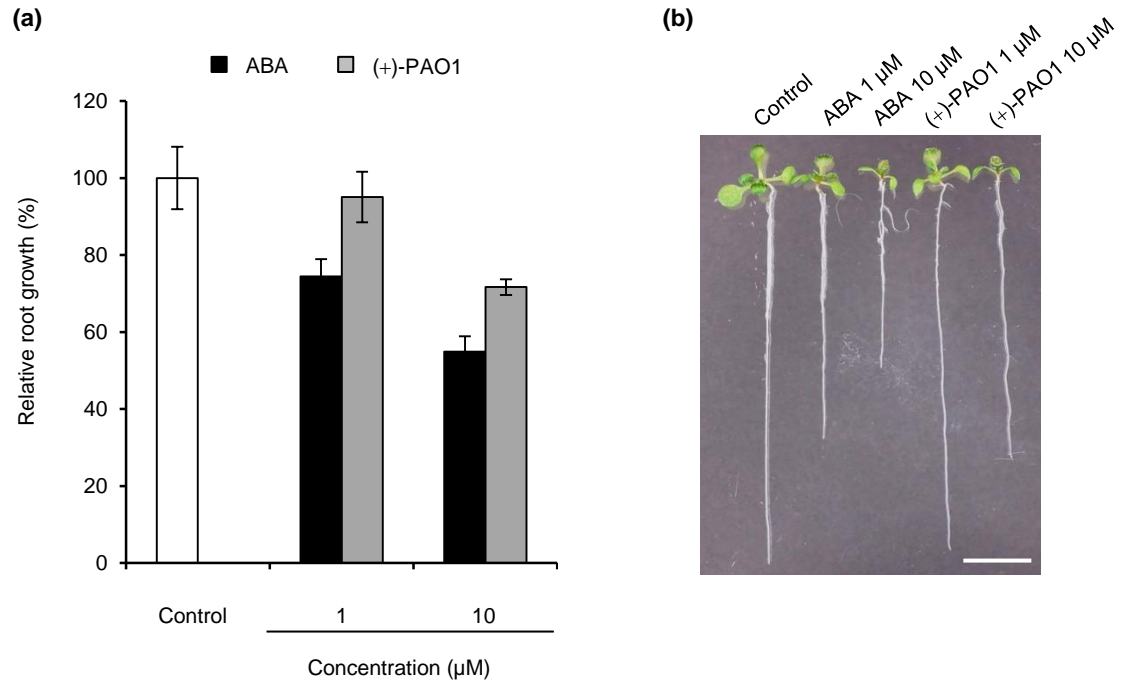

Supplementary Figure 9 Effect of (+)-PAO1 on *Arabidopsis* root growth compared with that of ABA. (a) Primary root lengths of 12 plants were measured after 7 d in medium lacking or supplemented with (+)-PAO1 or ABA. Data are averages from three independent experiments ( $n = 12$  each; error bars represent s.d.). (b) The photograph shows representative seedlings 7 d after the transfer of 5-d-old seedlings from 1/2 MS medium to plates supplemented with (+)-PAO1 or ABA (scale bar represents 10 mm).

## 2) $^1\text{H}$ and $^{13}\text{C}$ NMR Spectrums of Synthesized Compounds

### $^1\text{H}$ NMR spectrum of Compound # 8

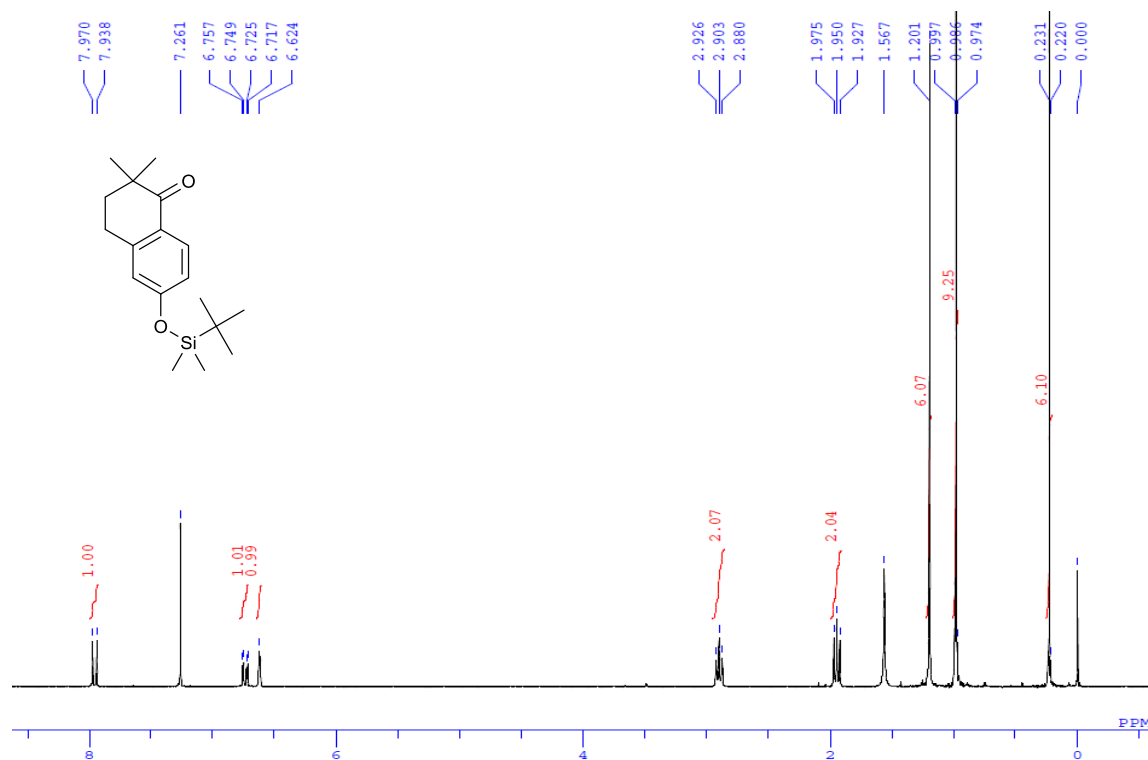

### $^{13}\text{C}$ NMR spectrum of Compound #8

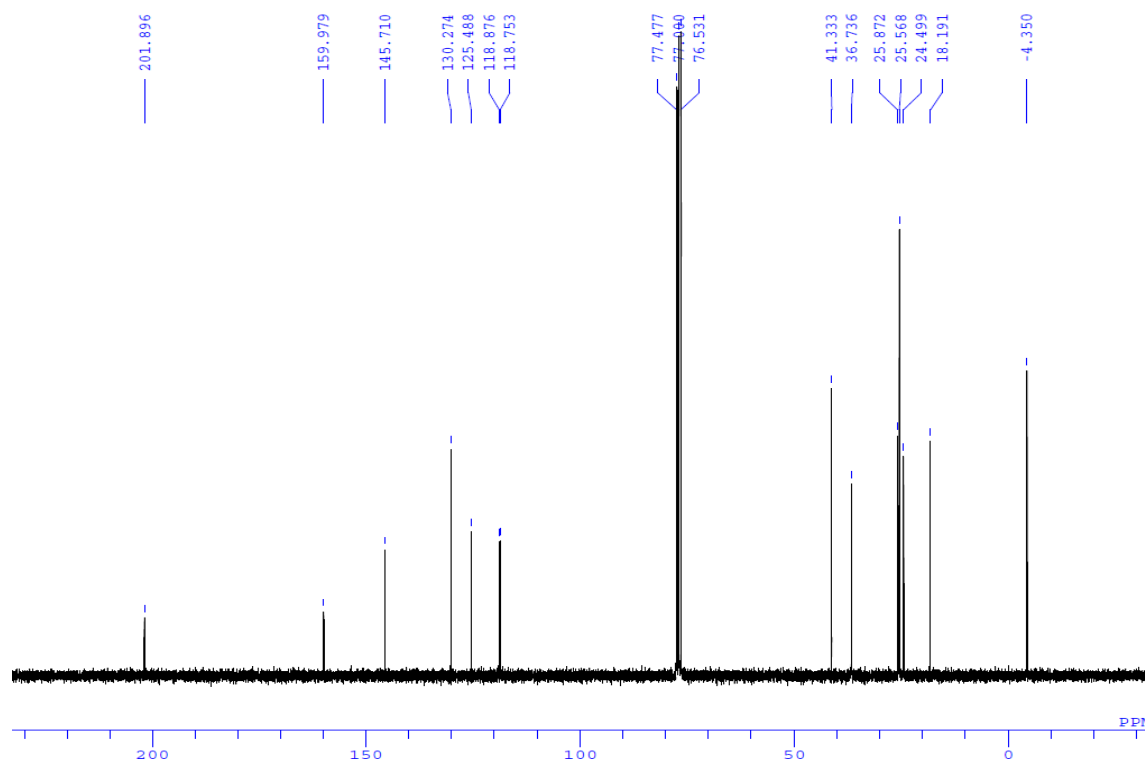

<sup>1</sup>H NMR spectrum of Compound #9

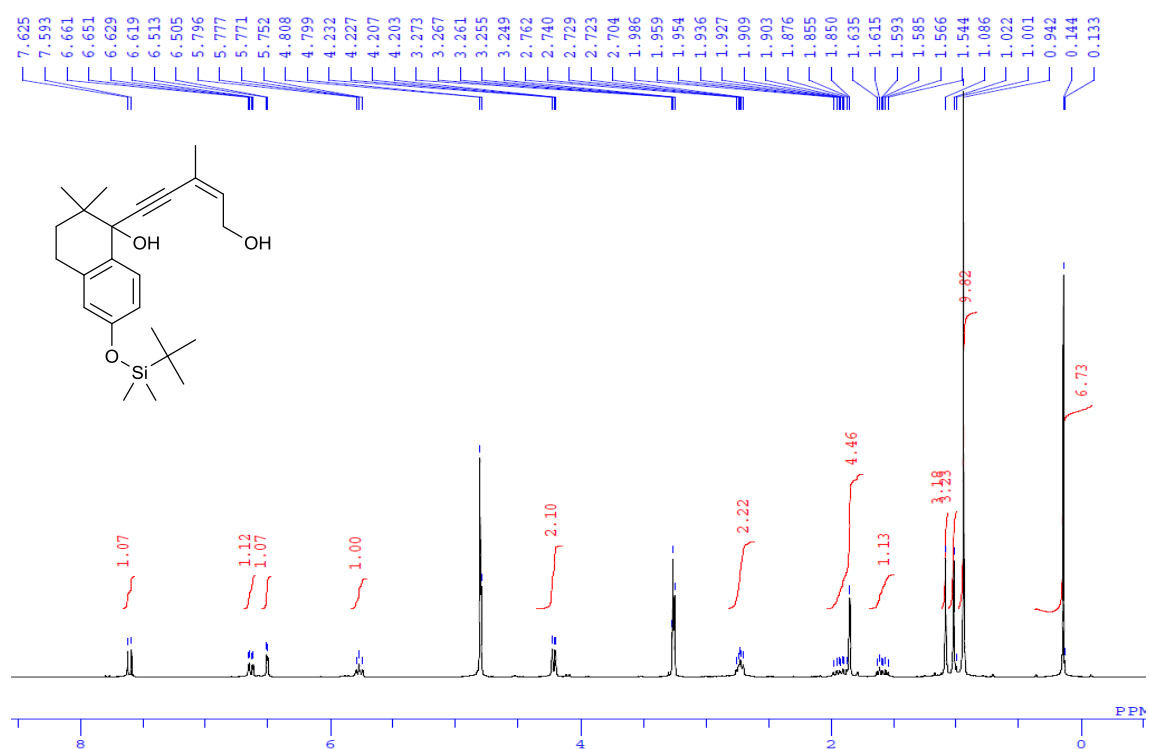

<sup>13</sup>C NMR spectrum of Compound #9

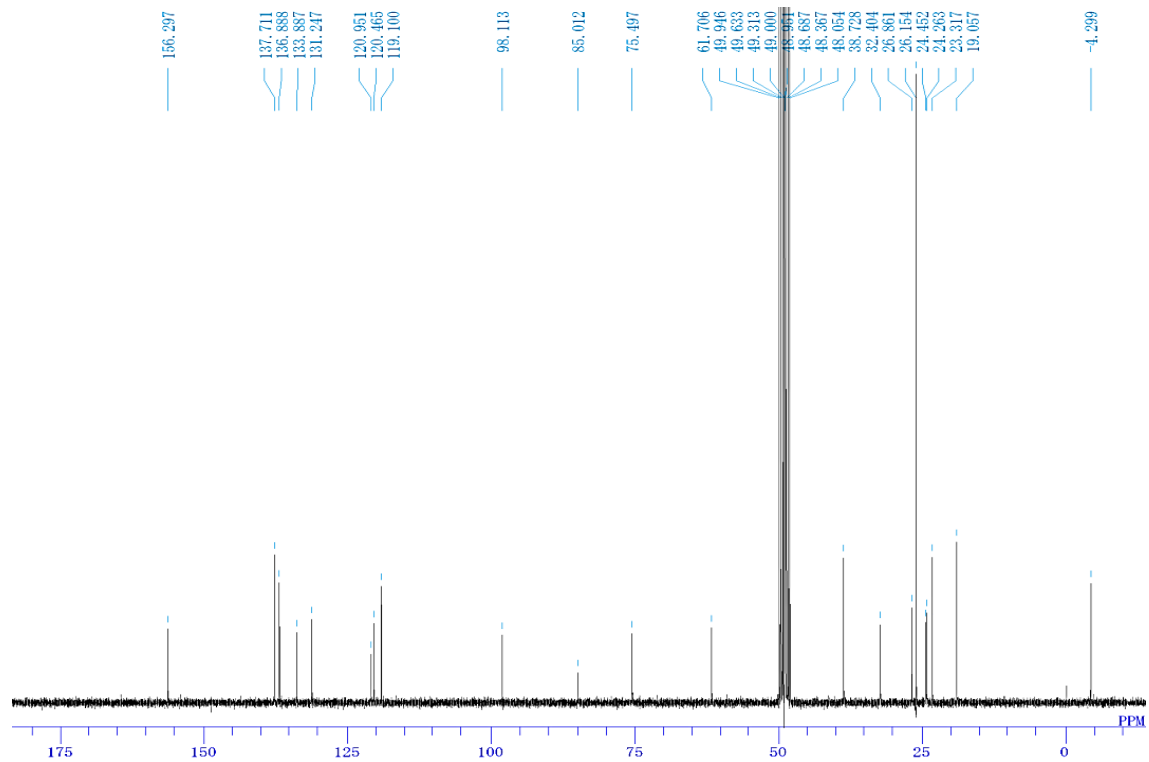

<sup>1</sup>H NMR spectrum of Compound #10

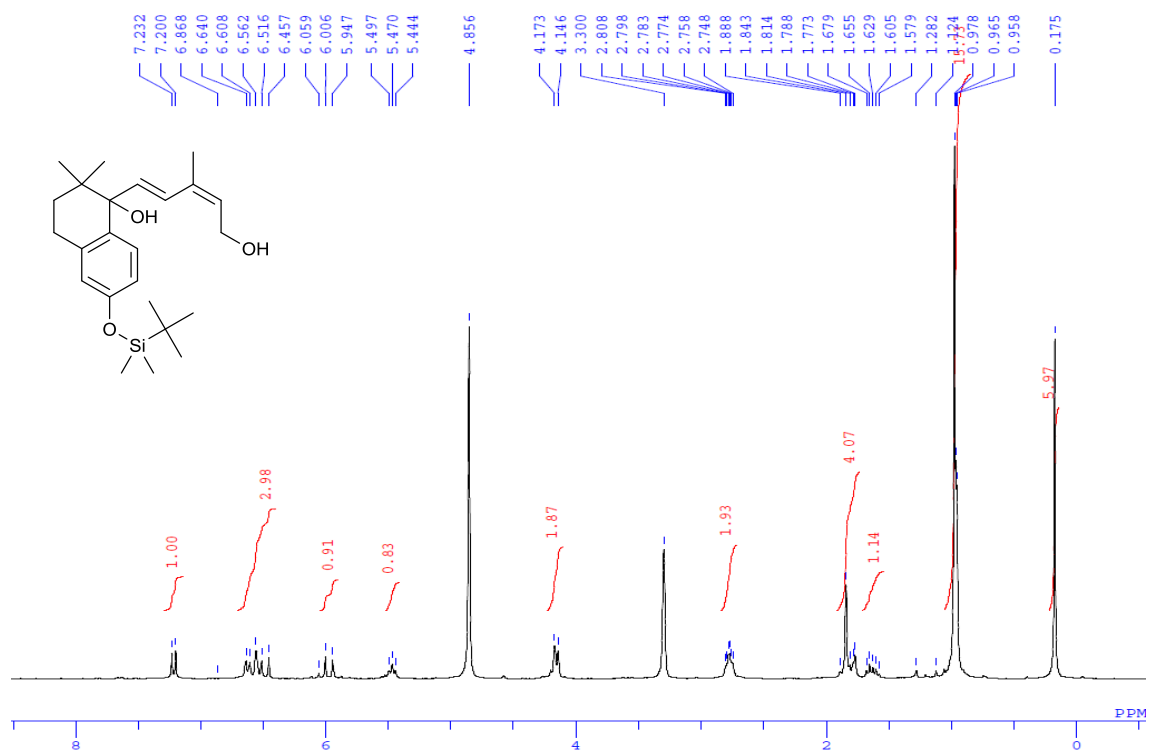

<sup>13</sup>C NMR spectrum of Compound #10

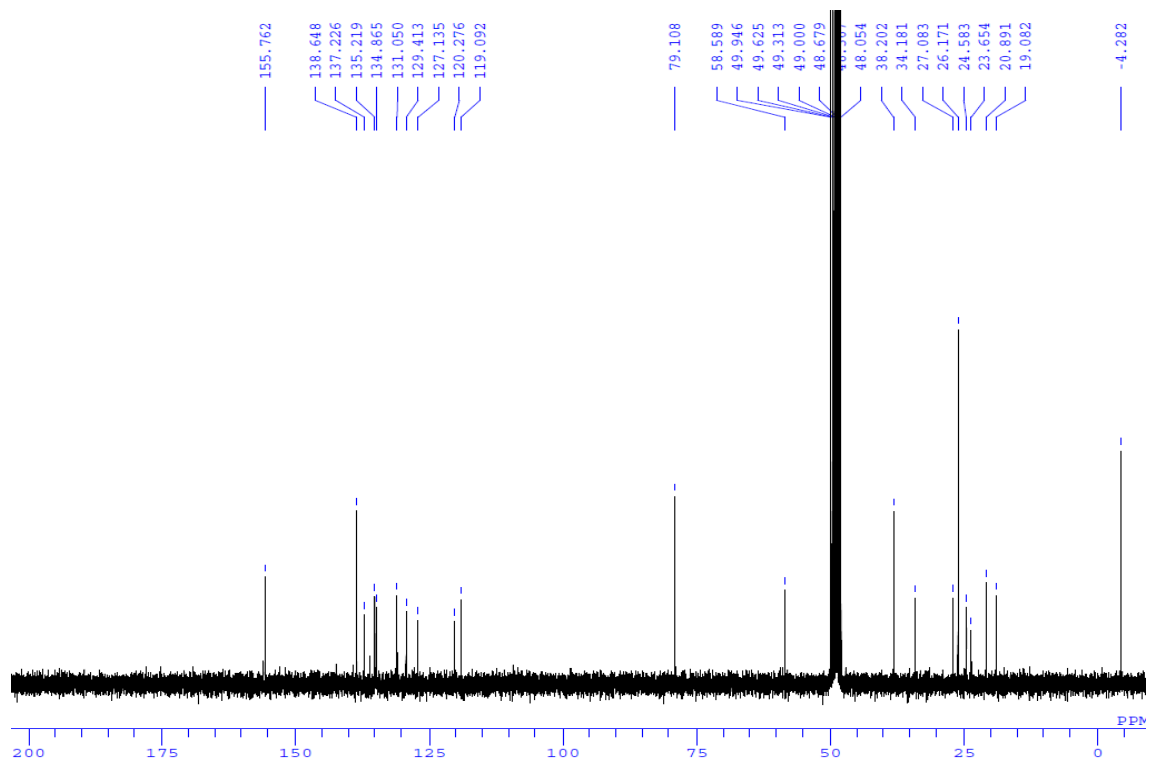

<sup>1</sup>H NMR spectrum of Compound #12

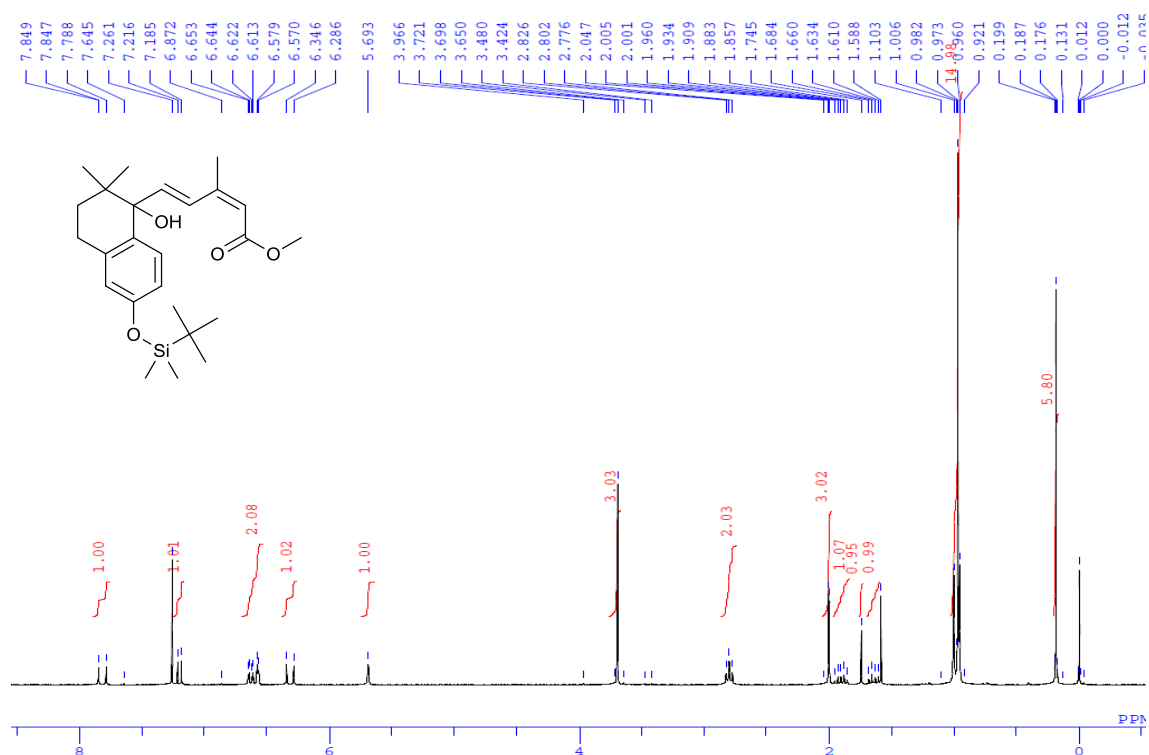

<sup>13</sup>C NMR spectrum of Compound #12

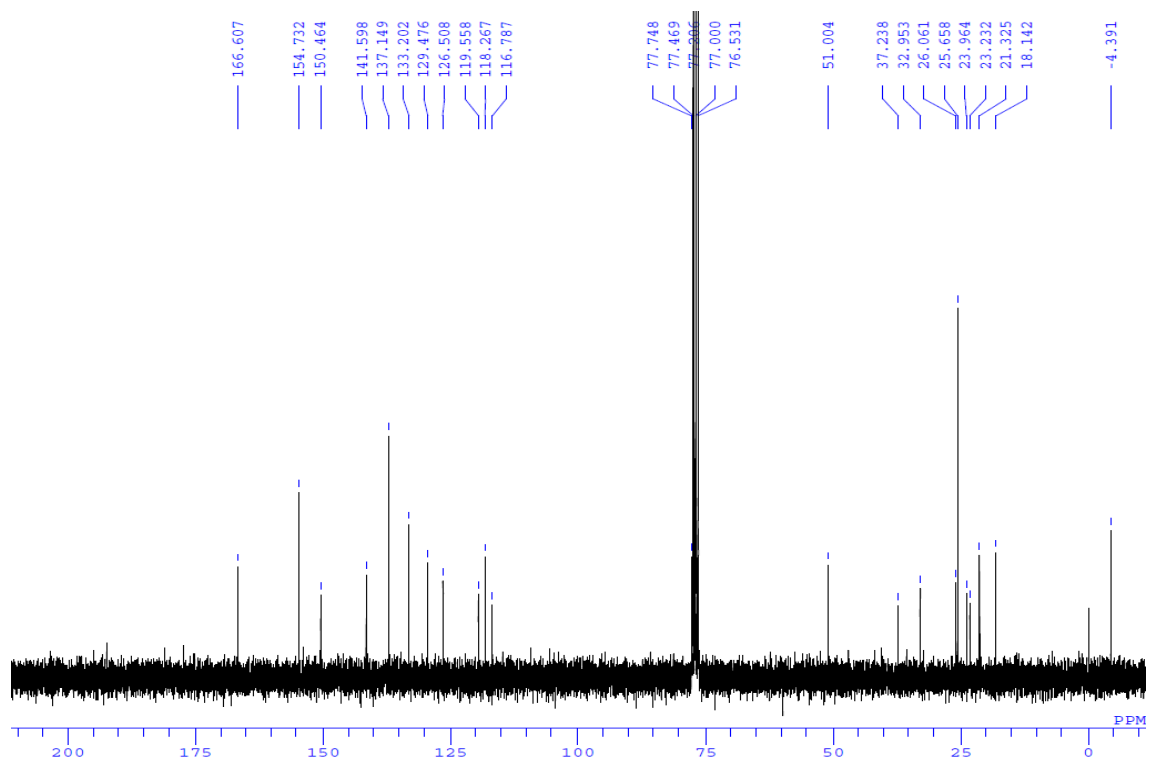

<sup>1</sup>H NMR spectrum of Compound #13

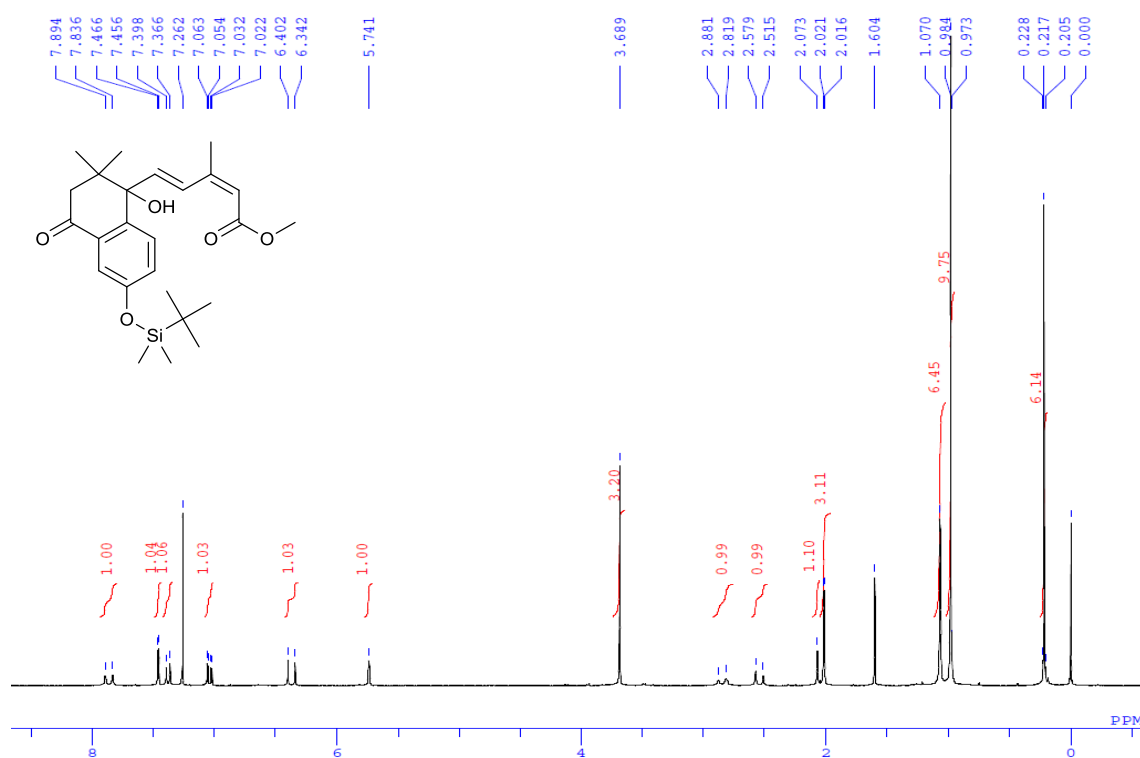

<sup>13</sup>C NMR spectrum of Compound #13

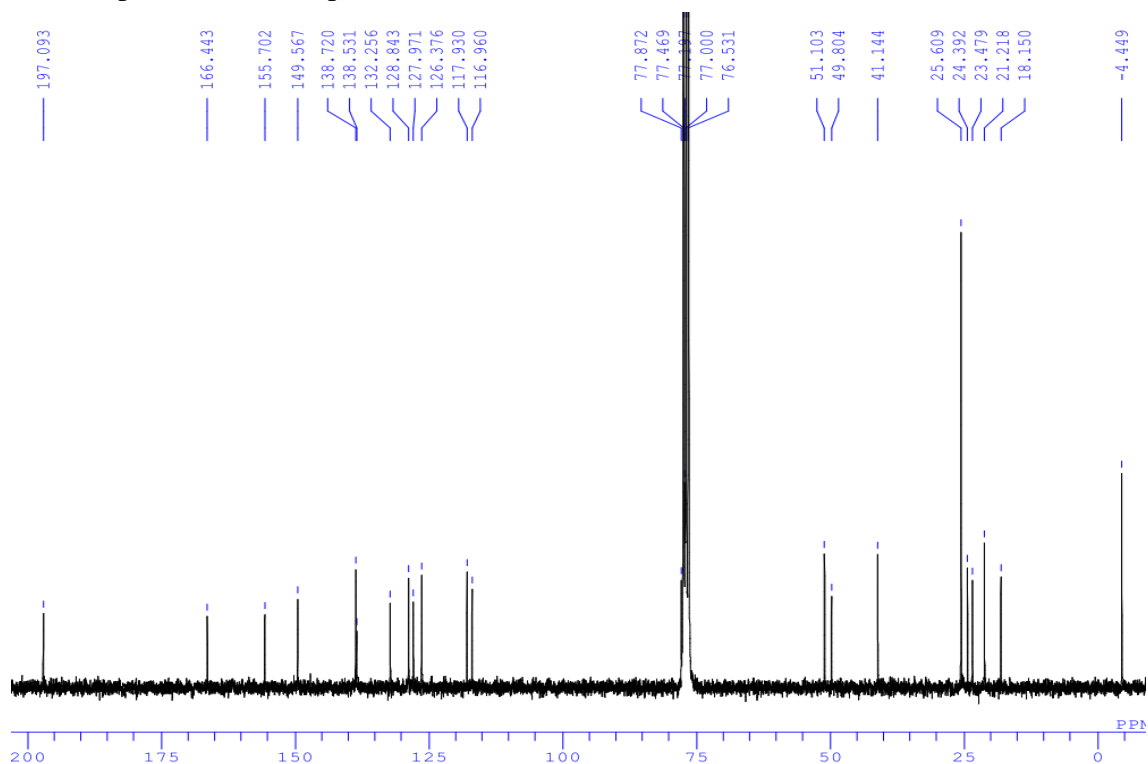

<sup>1</sup>H NMR spectrum of Compound #14

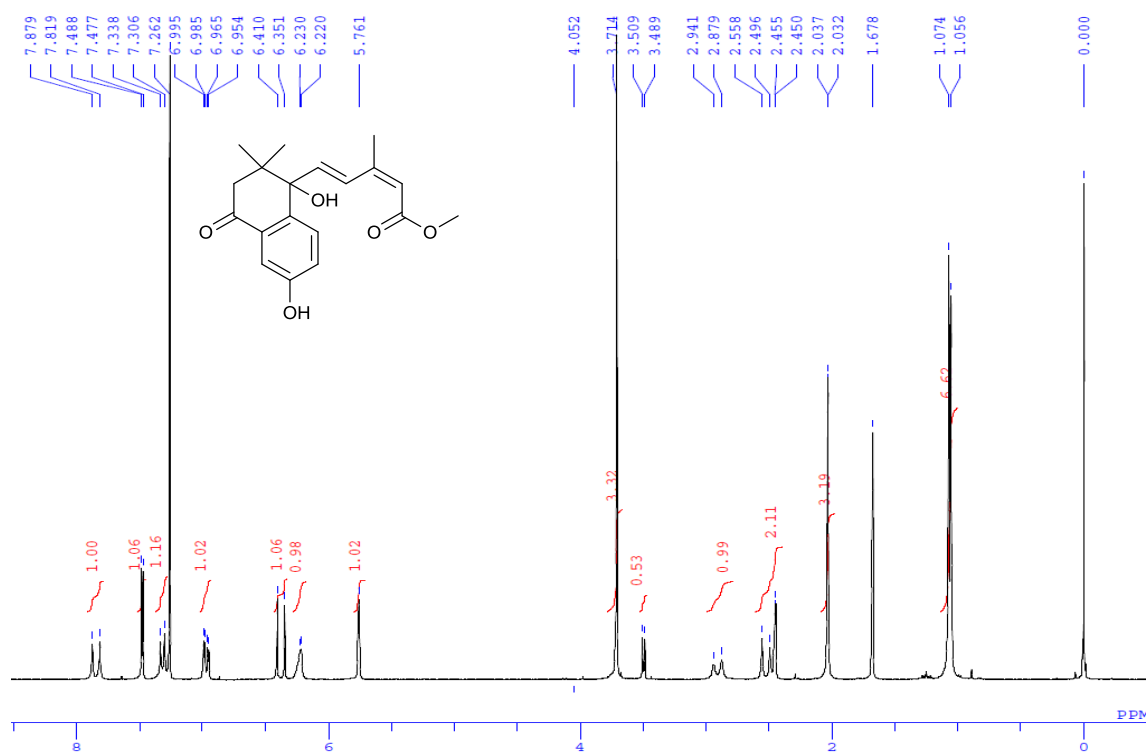

<sup>13</sup>C NMR spectrum of Compound #14

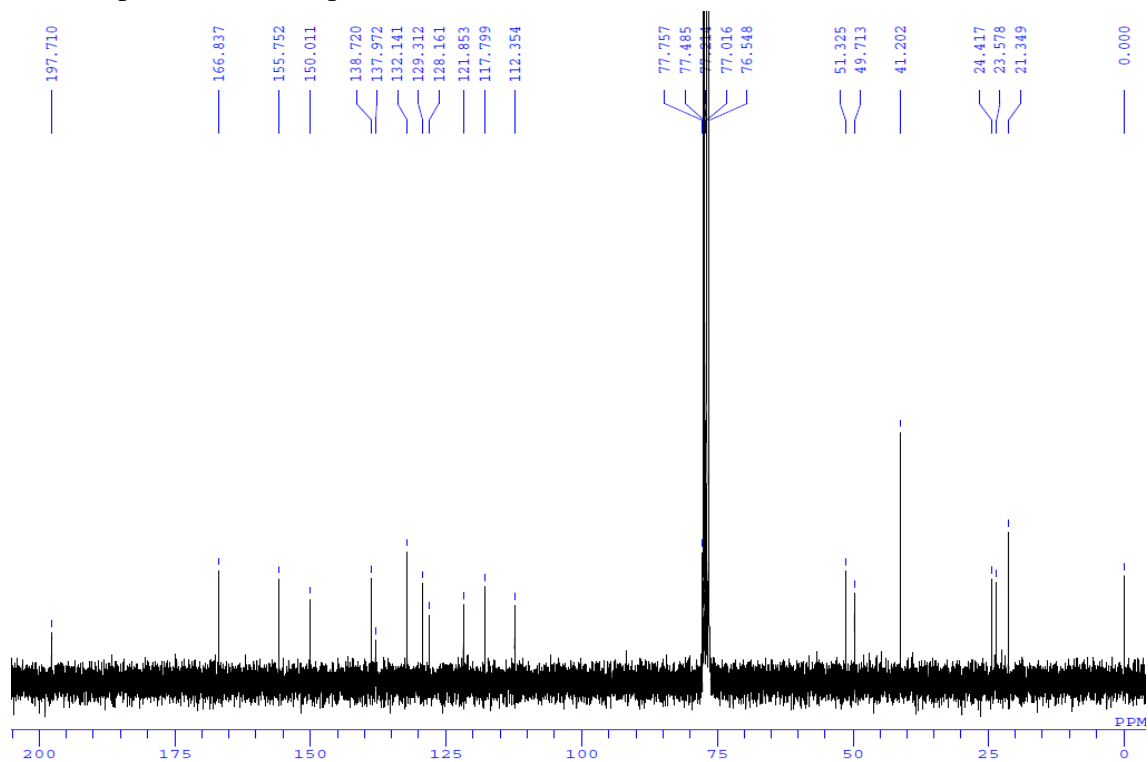



<sup>1</sup>H NMR spectrum of Compound #15

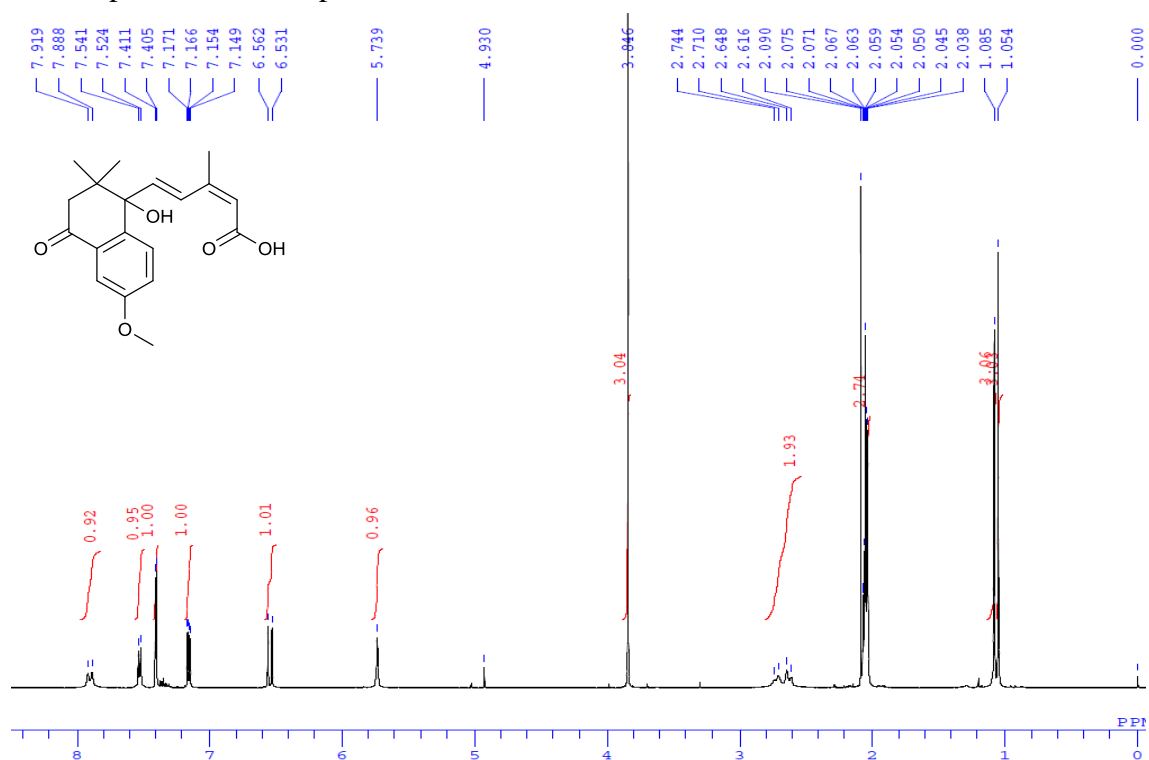

<sup>13</sup>C NMR spectrum of Compound #15

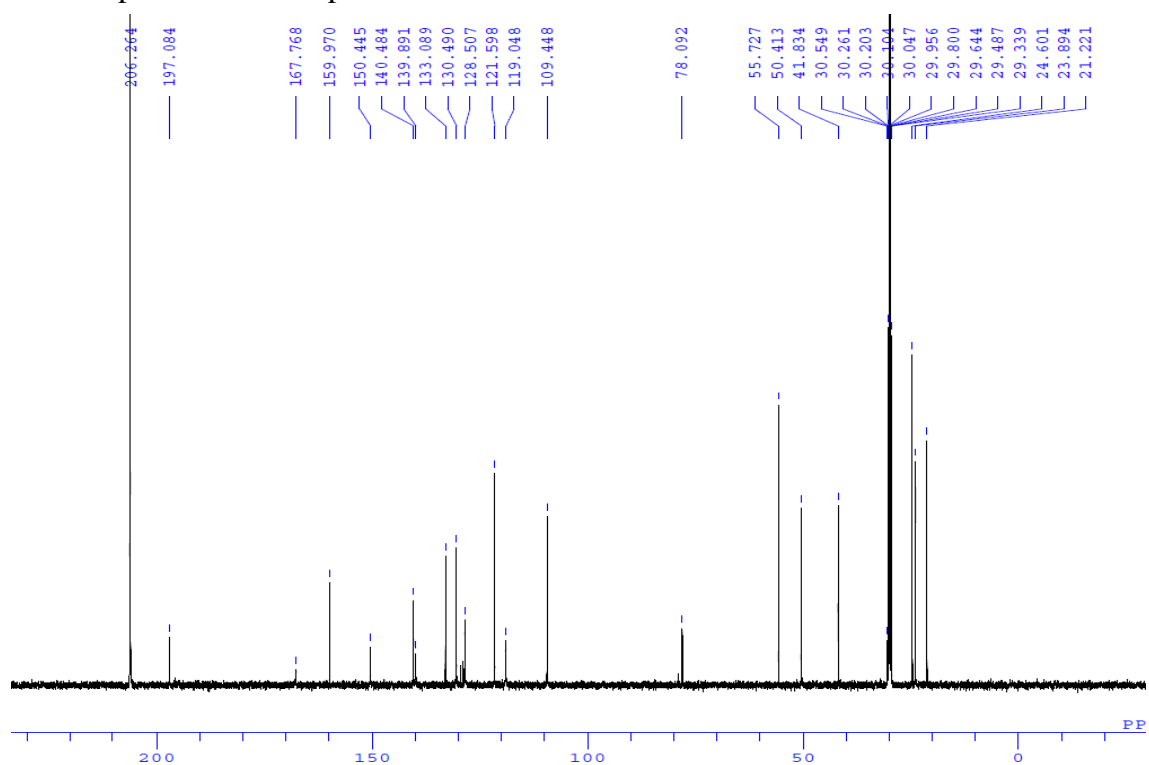

<sup>1</sup>H NMR spectrum of Compound #16

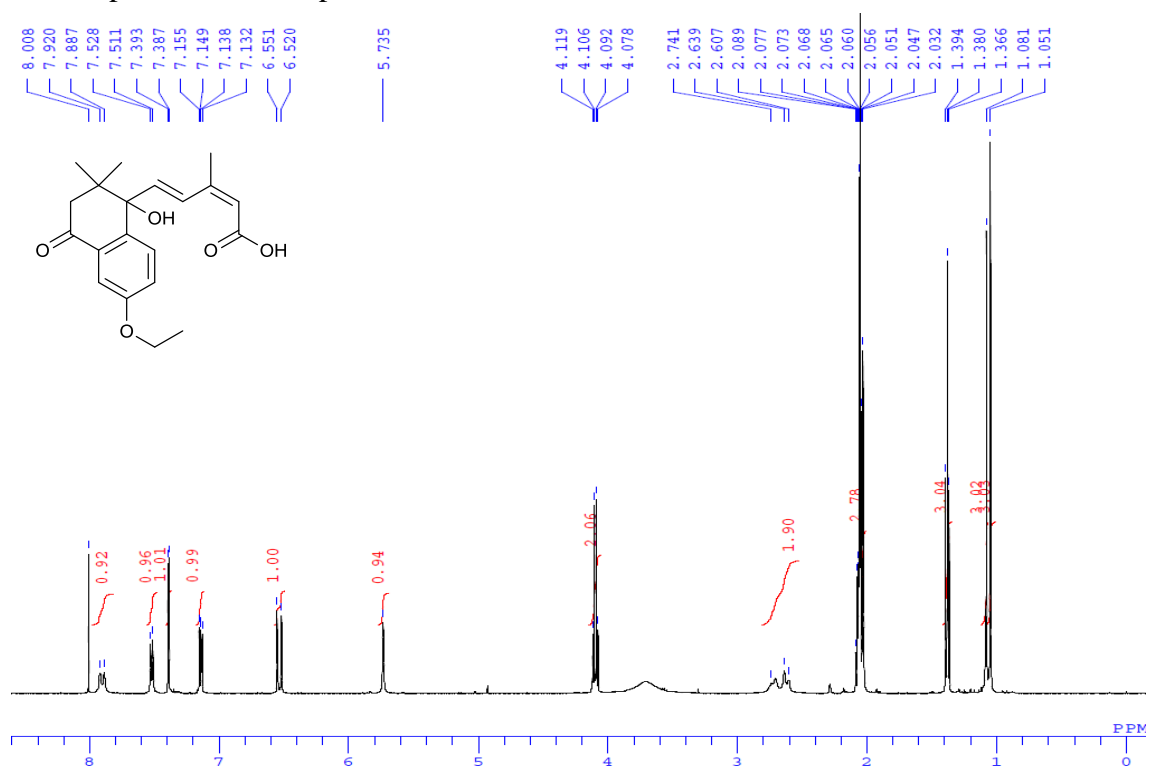

<sup>13</sup>C NMR spectrum of Compound #16

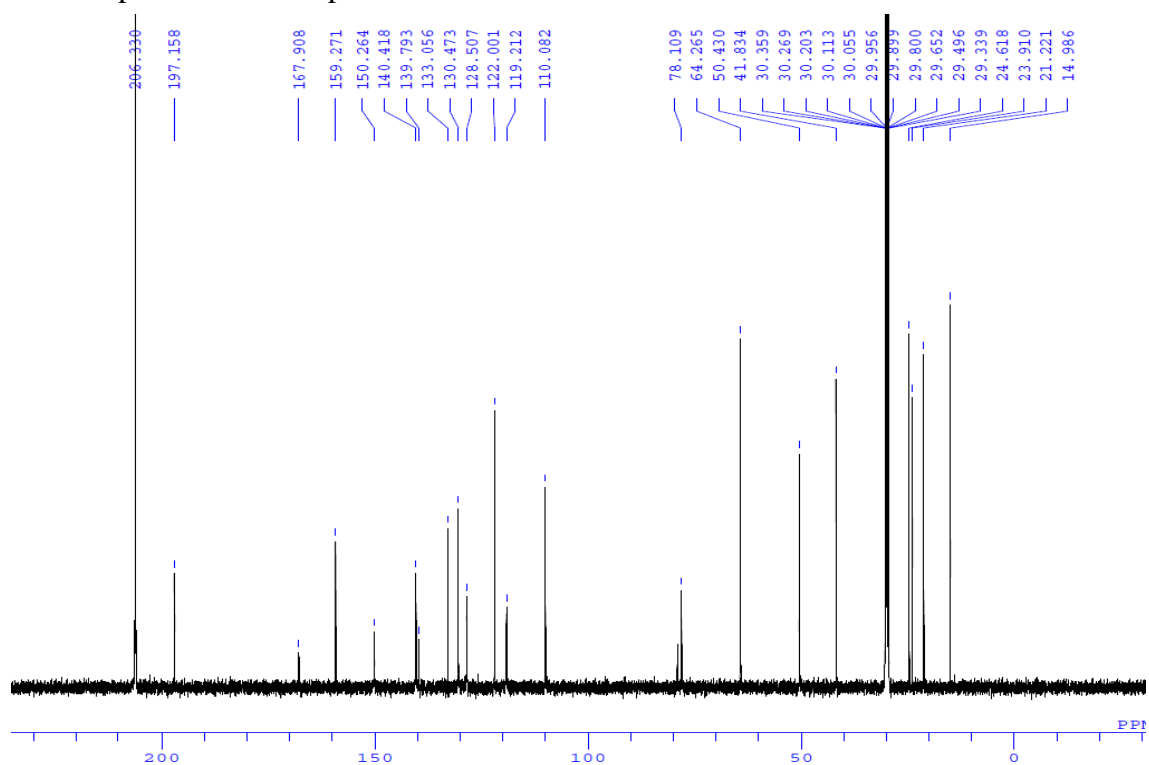

<sup>1</sup>H NMR spectrum of Compound #17

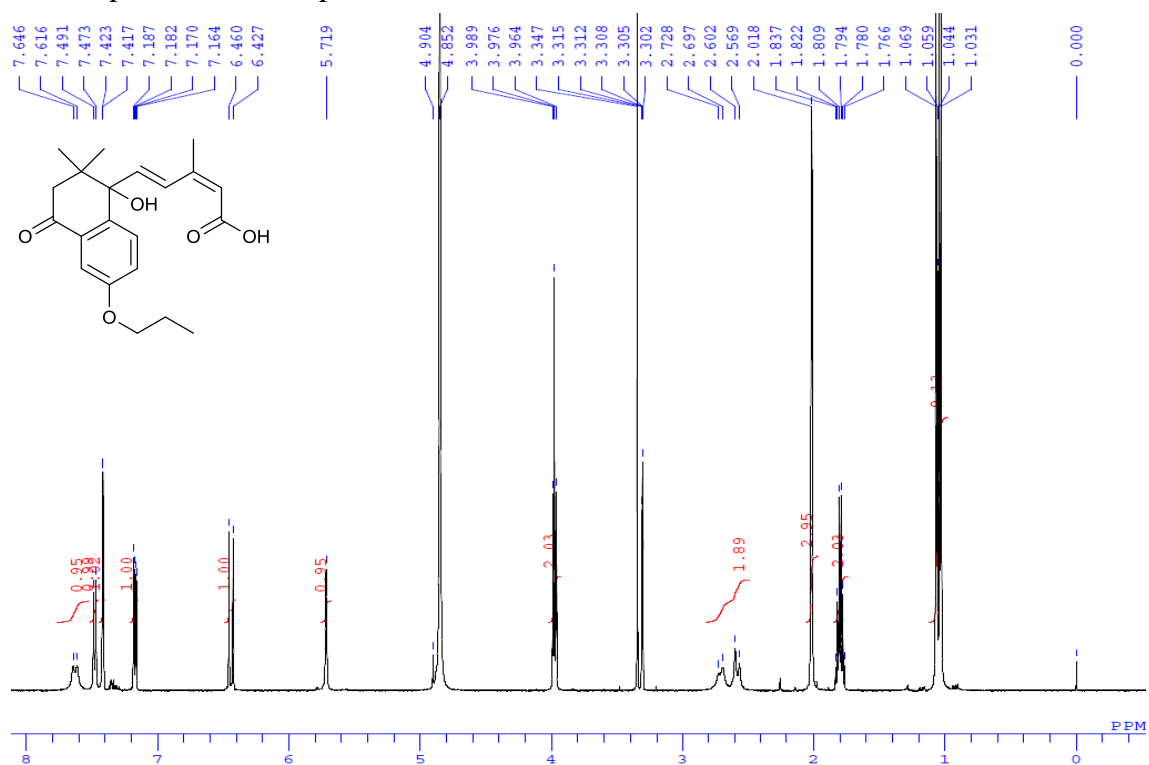

<sup>13</sup>C NMR spectrum of Compound #17

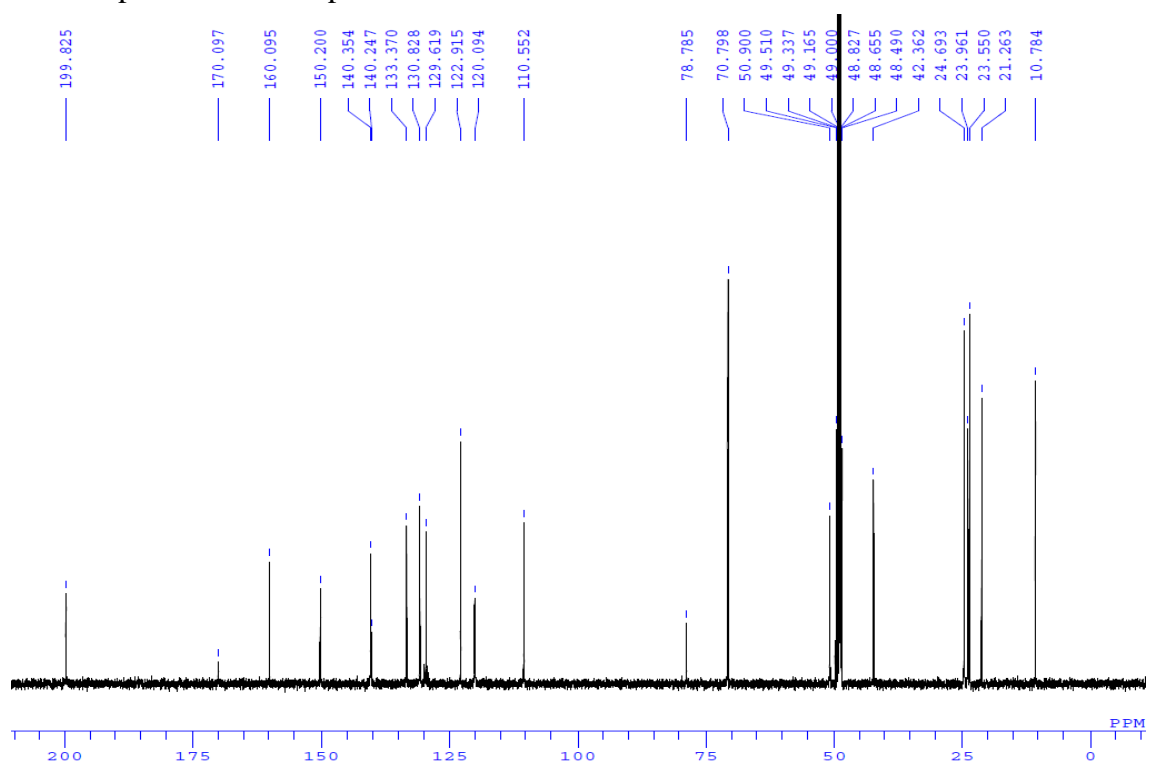

<sup>1</sup>H NMR spectrum of Compound #18

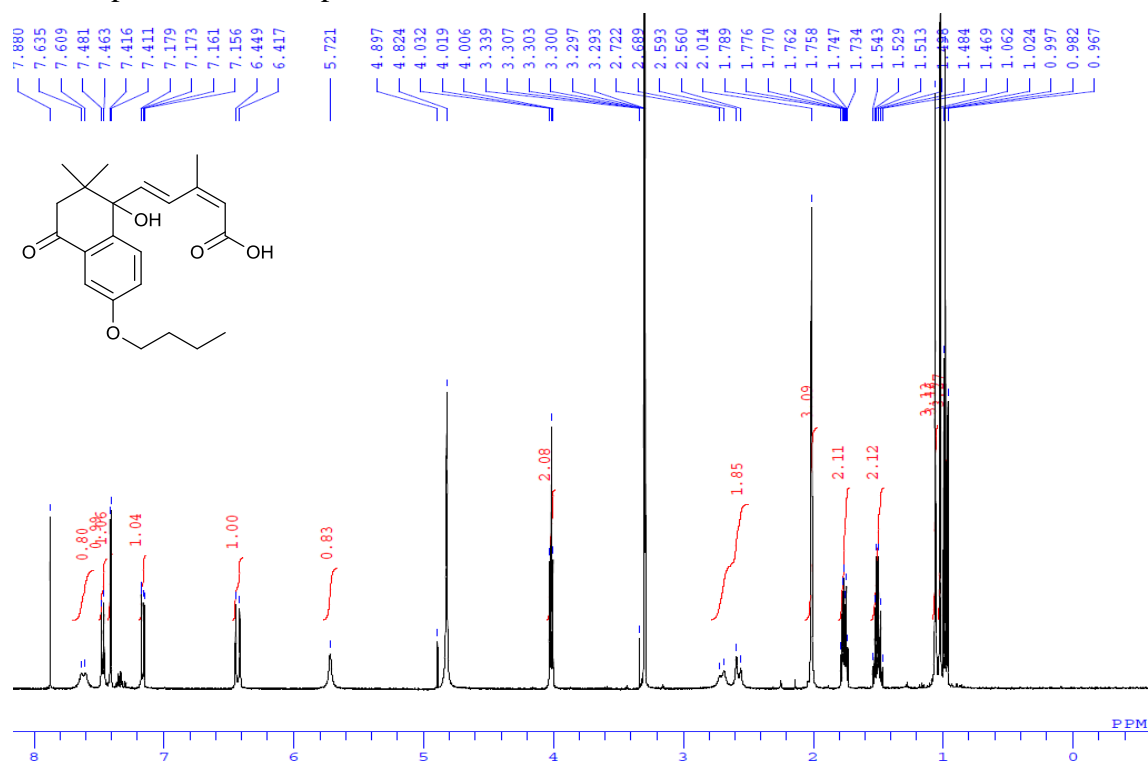

<sup>13</sup>C NMR spectrum of Compound #18

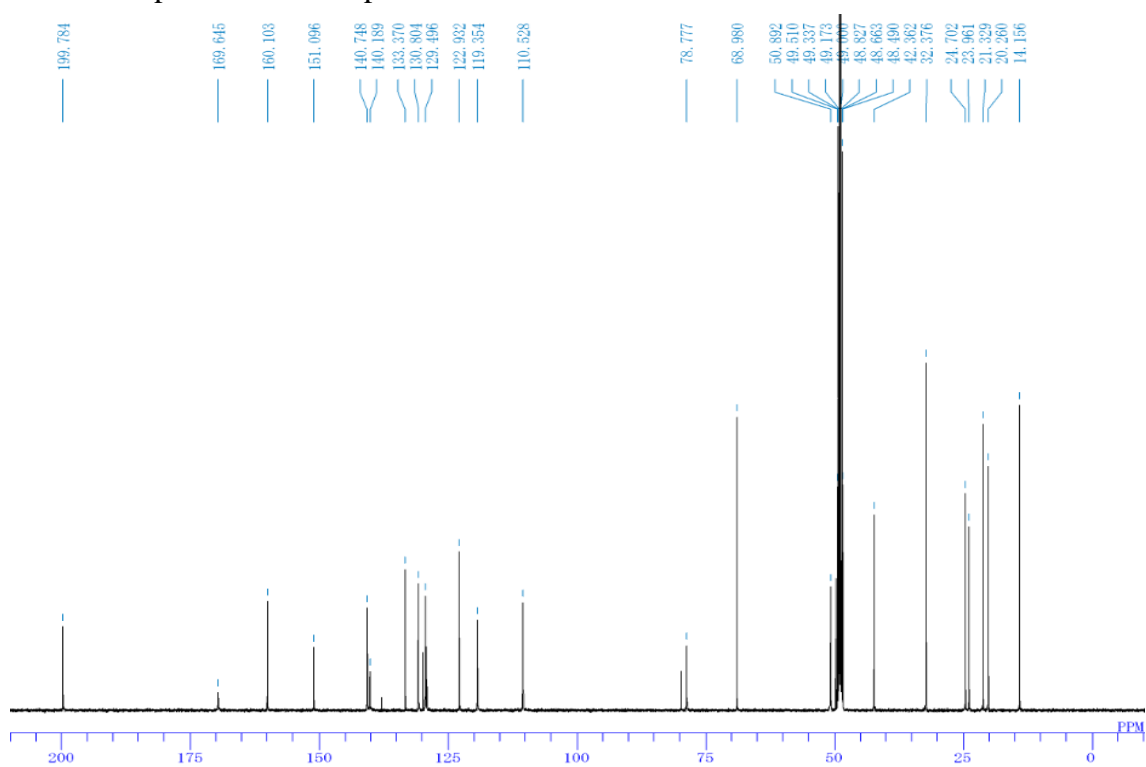

<sup>1</sup>H NMR spectrum of Compound #19

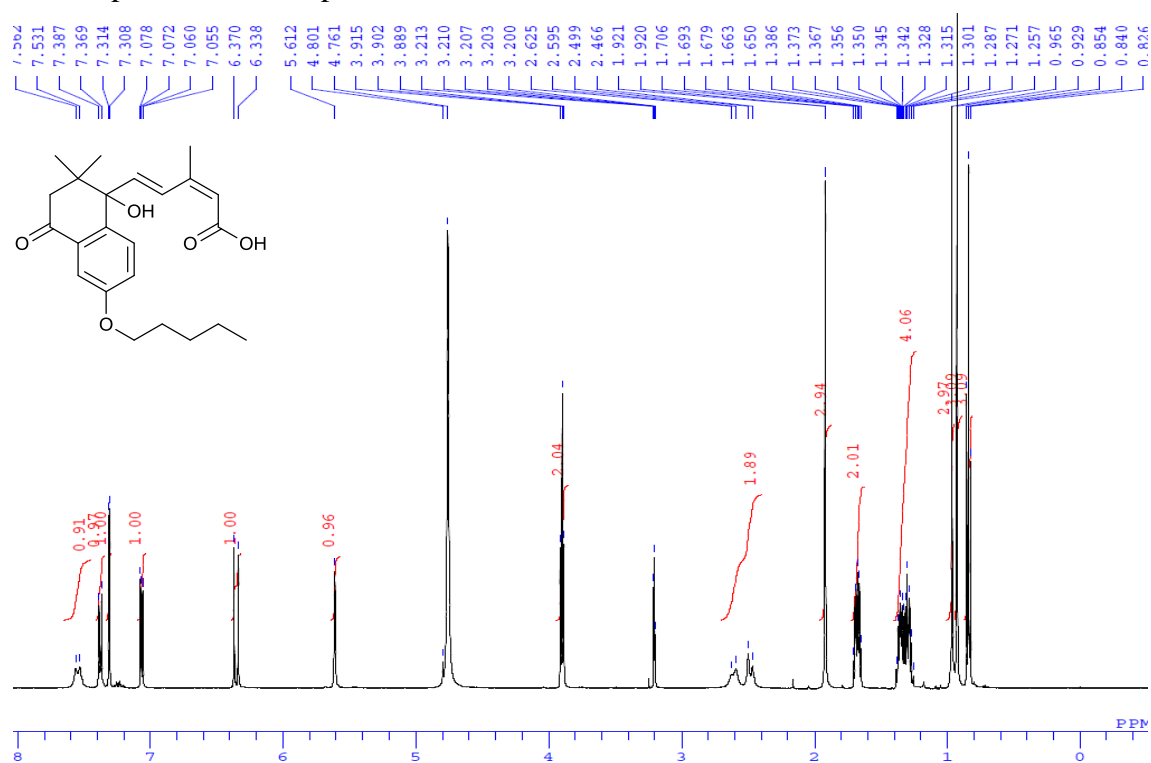

<sup>13</sup>C NMR spectrum of Compound #19

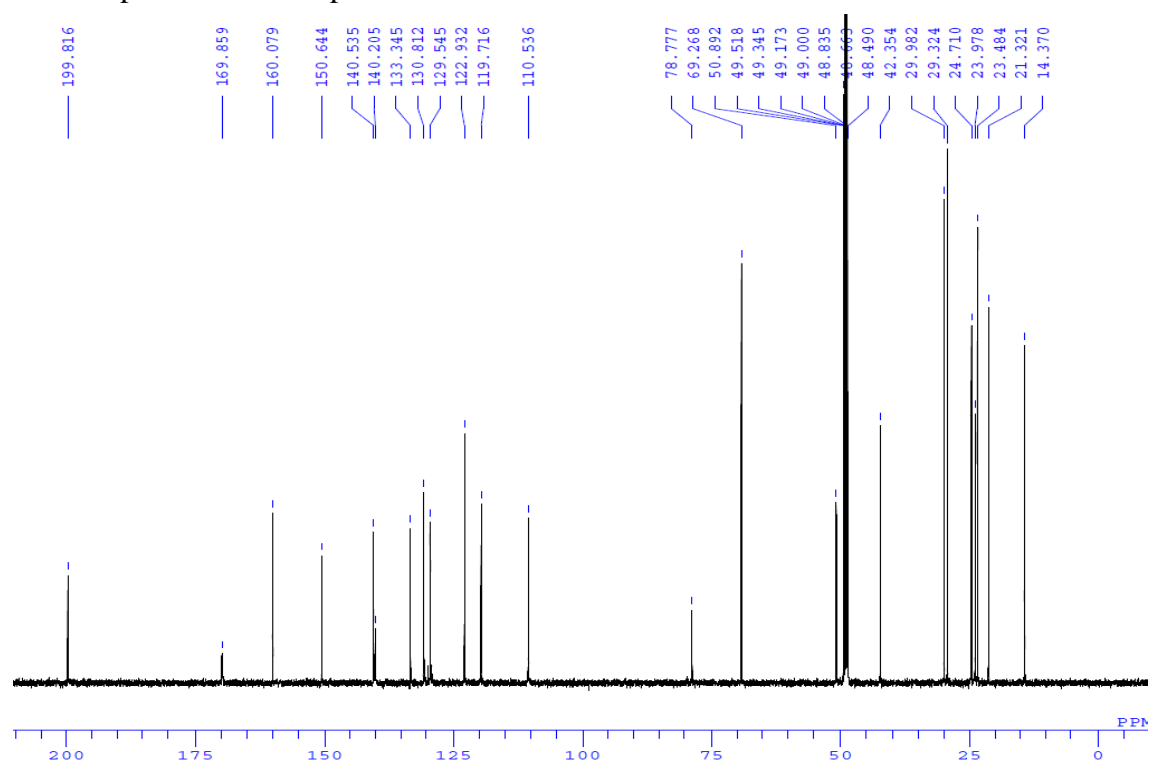

<sup>1</sup>H NMR spectrum of Compound #20

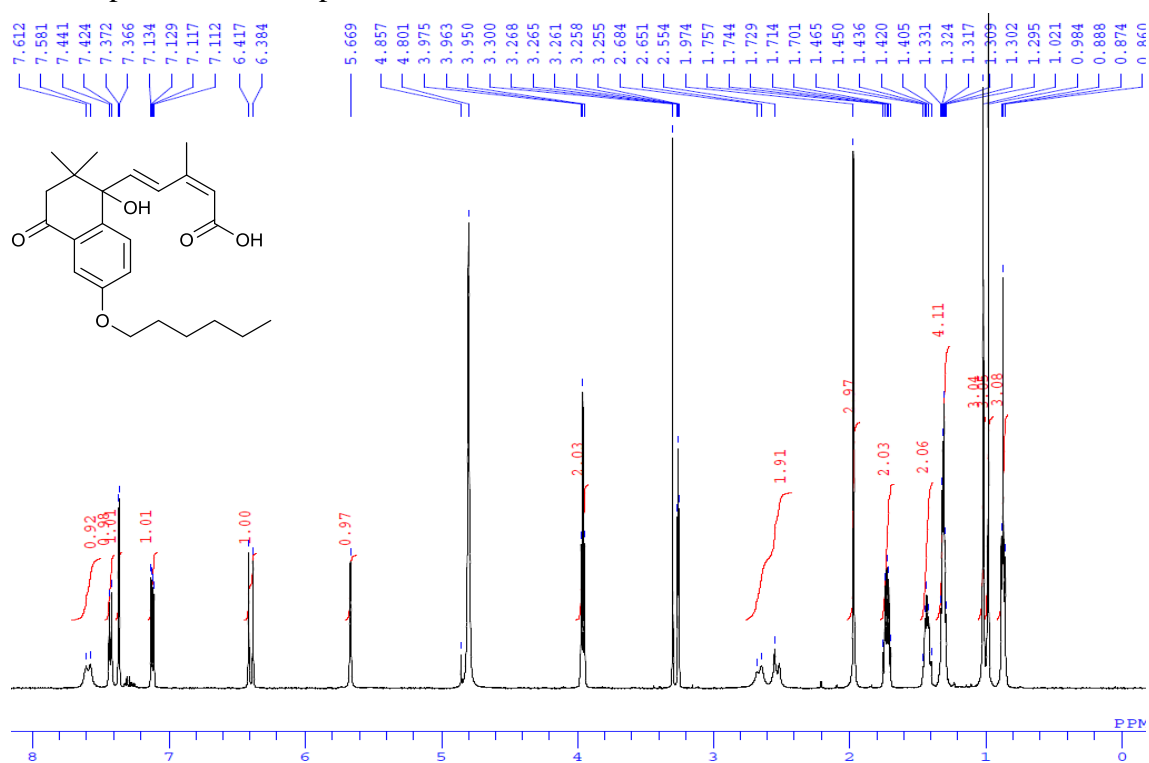

<sup>13</sup>C NMR spectrum of Compound #20

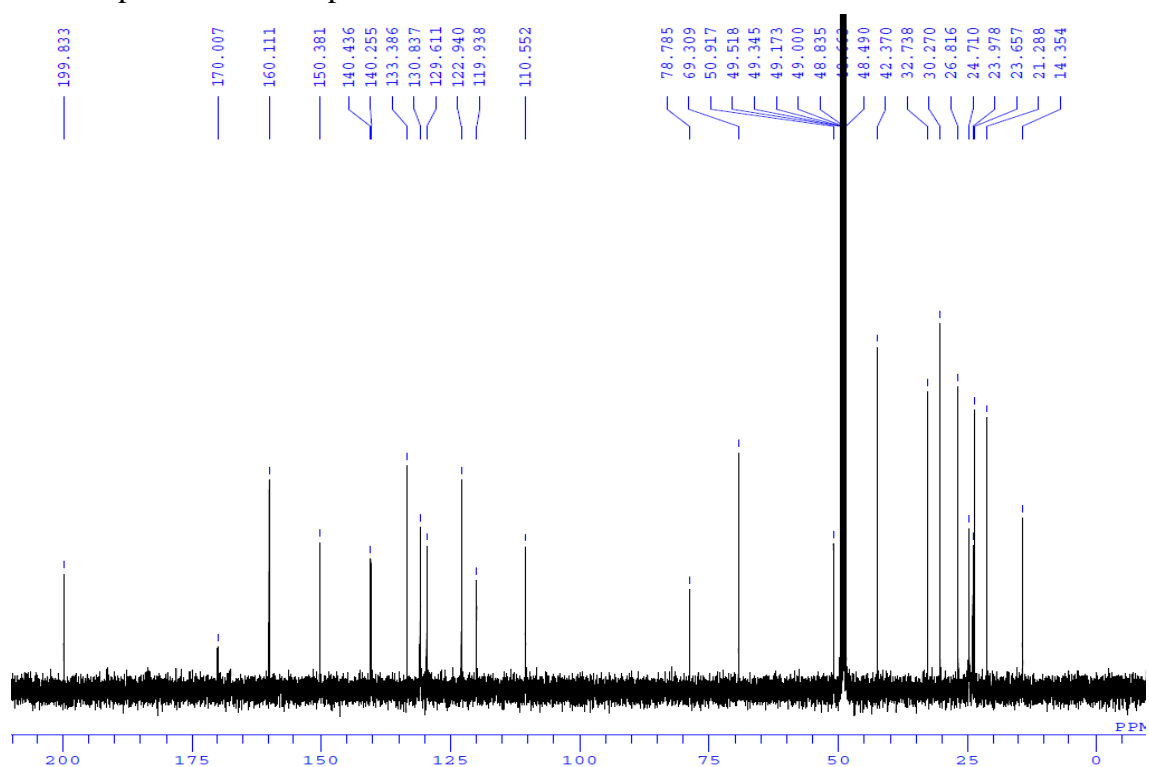

Supplement: c4ob02662d1.pdf [file c4ob02662d1.pdf]
